# Supplementary material
Source: PubMed Central journal article supplement (PMC7919153)
Supplement: AnnalsATS.202002-169OC_ackrivo_data_supplement.pdf [file AnnalsATS.202002-169OC_ackrivo_data_supplement.pdf]

**Non-invasive Ventilation Use is Associated with Better Survival in Amyotrophic  
Lateral Sclerosis**

Jason Ackrivo, MD, MSCE

Jesse Y. Hsu, PhD

John Hansen-Flaschen, MD

Lauren Elman, MD\*

Steven M. Kawut, MD, MS\*

\*Equal contribution

**Online Data Supplement.**

## **Methods**

### **Symptom onset site**

Site of symptom onset was determined by the patients' report of the predominant muscle(s) involved at the time of disease onset. The attending neurologist would categorize the patient's initial site of symptom onset as either bulbar or limb. Bulbar onset indicated first symptoms were related to dysfunction of speech or swallowing, while limb onset indicated initial dysfunction included the arms or legs.

### **ALSFRS-R score**

The ALS Functional Rating Scale-Revised (ALSFRS-R) score is a standardized, validated, widely-used method for staging functional status of an ALS patient in clinical care as well as clinical trials.(1–4) The ALSFRS-R has been shown to correlate with progression of disease and survival, as well as have validity and reliability.(3, 5) There are 12 questions covering four domains, including gross motor tasks, fine motor tasks, bulbar function, and respiratory function. Each question rates an individual's function for that domain on a scale of zero (minimal function) to four (maximal function). The range of the total ALSFRS-R score is from zero (most severe symptoms) to 48 (minimal to no symptoms). Most pertinent components to this study include two of the respiratory components of the ALSFRS-R, dyspnea and orthopnea.

## **Diagnosis delay**

Diagnosis delay represents the time between patient-reported onset of symptoms and the date of diagnosis by an attending neurologist. It is a characteristic used in prior ALS literature to approximate the rapidity of disease progression.(6, 7)

## **Other missing data**

Missing data from Penn were addressed using multiple imputation by chained equations with creation of 20 imputed datasets.(8, 9) We registered variables with complete data as predictors for imputation, including diagnosis age, age at symptom onset, sex, race, smoking history, and visit date.

## **Subgroup analyses**

### **Primary analysis – NIV daily hourly usage**

We performed several subgroup analyses. Using NIV subjects only, we performed matching and Cox proportional hazards model adjustment (described in the main body text) to estimate whether daily hourly NIV use was associated with survival. We adjusted for confounders similar to the main survival analysis. For each NIV subject, we used patient-reported NIV hourly usage for all visits post matching to create a variable for overall mean daily NIV hours. We then analyzed survival among NIV subjects, categorized by mean hourly usage.

## **Primary analysis – Symptom-onset site**

Using NIV and non-NIV subjects, we performed the aforementioned matching and Cox proportional hazards model adjustment to estimate NIV association with survival based on ALS symptom onset site. We estimated NIV association with survival among subjects with limb-onset disease and separately among subjects with bulbar-onset disease. We adjusted for confounders similar to the main survival analysis. NIV survival effect estimates were stratified by matched groups.

## **Secondary analysis – Time-matched groups**

### **FVC % predicted**

Our primary analysis matched using FVC and symptom-onset site and precluded adjusting for these variables in the survival analysis. Therefore, our secondary analysis created “time-matched groups” matched with only two time variables: diagnosis delay time and follow-up time since first visit. We performed a Cox proportional hazards model that adjusted for FVC % predicted value at time of matching and baseline symptom onset site. We also adjusted for the confounders from the primary analysis.

## **Results**

### **Baseline characteristics of full, unmatched Penn cohort**

The Penn cohort had 864 subjects (**Table E1**). The average age at diagnosis was 64, 55% were self-reported male, and 84% were Caucasian. The majority of subjects had a normal or overweight BMI at baseline. The median diagnosis delay was 1.0 years. Seventy-six percent had limb-onset disease, while the average FVC at baseline was

75%. The mean baseline ALSFRS-R total score was 36, while the majority of subjects had no significant orthopnea or dyspnea at baseline by ALSFRS-R scores. Fifty-three percent described themselves as “never” smokers. The median survival time was 1.4 years (IQR, 0.7 – 2.5).

We compared unmatched to matched subjects in **Table E2**. Unmatched individuals tended to have a longer diagnosis delay, less Definite ALS by El Escorial criteria, higher baseline FVC, higher baseline ALSFRS-R total, higher ALSFRS-R dyspnea and orthopnea scores, and longer survival since first visit and since symptom onset. Among unmatched subjects, 73% (n=301) were non-NIV subjects and 27% (n=111) were NIV subjects. Median unadjusted survival time since first visit for NIV subjects was 23 months (IQR, 15 – 43), and for non-NIV subjects was 18 months (IQR, 7 – 41) (p=0.003). There was no significant difference in survival since symptom onset.

**Table E1.** Baseline characteristics of full, unmatched Penn cohort (N=864)

| <b>Variable</b>                   |                |
|-----------------------------------|----------------|
| Age at diagnosis, years           | 64 ± 12        |
| Male sex, n (%)                   | 473 (55)       |
| Race, n (%)                       |                |
| Caucasian                         | 728 (84)       |
| African American                  | 70 (8)         |
| Other                             | 66 (8)         |
| Body mass index class, n (%)      |                |
| <18.5 kg/m <sup>2</sup>           | 35 (4)         |
| 18.5 – 24.9 kg/m <sup>2</sup>     | 371 (43)       |
| 25 – 29.9 kg/m <sup>2</sup>       | 299 (35)       |
| ≥30 kg/m <sup>2</sup>             | 158 (18)       |
| Diagnosis delay, years            | 1.0 (0.6, 1.8) |
| EI Escorial criteria, n (%)       |                |
| Definite ALS                      | 181 (21)       |
| Possible ALS                      | 216 (25)       |
| Probable ALS                      | 269 (31)       |
| Suspected ALS                     | 198 (23)       |
| Symptom onset site, n (%)         |                |
| Limb                              | 653 (76)       |
| Bulbar                            | 211 (24)       |
| Forced vital capacity % predicted | 75 ± 24        |
| ALSFRS-R total score              | 36 ± 7         |
| ALSFRS-R dyspnea, n (%)           |                |
| >2                                | 721 (83)       |
| ≤2                                | 143 (17)       |
| ALSFRS-R orthopnea, n (%)         |                |
| >2                                | 774 (90)       |
| ≤2                                | 90 (10)        |
| Smoking history, n (%)            |                |
| Current                           | 81 (10)        |
| Previous                          | 323 (37)       |
| Never                             | 460 (53)       |
| Coronary artery disease, n (%)    | 71 (8)         |
| Diabetes mellitus, n (%)          | 101 (12)       |
| Hypertension, n (%)               | 345 (40)       |

*Definition of abbreviations:* ALS = amyotrophic lateral sclerosis; ALSFRS-R = ALS functional rating scale – revised.

Data are mean ± SD or median (25<sup>th</sup> percentile, 75<sup>th</sup> percentile).

**Table E2.** Baseline characteristics of unmatched versus matched subjects in the Penn cohort (N=864)

| Variable                          | Unmatched<br>n=412 | Matched<br>n=452 |
|-----------------------------------|--------------------|------------------|
| Age at diagnosis, years           | 63 ± 12            | 64 ± 12          |
| Male sex, n (%)                   | 230 (56)           | 243 (54)         |
| Race, n (%)                       |                    |                  |
| Caucasian                         | 359 (87)           | 369 (82)         |
| African American                  | 22 (5)             | 48 (10)          |
| Other                             | 31 (8)             | 35 (8)           |
| Body mass index class, n (%)      |                    |                  |
| <18.5 kg/m <sup>2</sup>           | 12 (3)             | 23 (5)           |
| 18.5 – 24.9 kg/m <sup>2</sup>     | 171 (42)           | 200 (44)         |
| 25 – 29.9 kg/m <sup>2</sup>       | 150 (36)           | 149 (33)         |
| ≥30 kg/m <sup>2</sup>             | 79 (19)            | 79 (18)          |
| Diagnosis delay, years            | 1.2 (0.6, 2.4)     | 0.9 (0.5, 1.2)   |
| EI Escorial criteria, n (%)       |                    |                  |
| Definite ALS                      | 70 (17)            | 111 (25)         |
| Possible ALS                      | 98 (24)            | 118 (26)         |
| Probable ALS                      | 121 (29)           | 148 (33)         |
| Suspected ALS                     | 123 (30)           | 75 (16)          |
| Symptom onset site, n (%)         |                    |                  |
| Limb                              | 320 (78)           | 333 (74)         |
| Bulbar                            | 92 (22)            | 119 (26)         |
| Forced vital capacity % predicted | 81 ± 23            | 69 ± 23          |
| ALSFRS-R total score              | 37 ± 7             | 35 ± 7           |
| ALSFRS-R dyspnea, n (%)           |                    |                  |
| >2                                | 367 (89)           | 354 (78)         |
| ≤2                                | 45 (11)            | 98 (22)          |
| ALSFRS-R orthopnea, n (%)         |                    |                  |
| >2                                | 384 (93)           | 390 (86)         |
| ≤2                                | 28 (7)             | 62 (14)          |
| Smoking history, n (%)            |                    |                  |
| Current                           | 36 (9)             | 45 (10)          |
| Previous                          | 150 (36)           | 173 (38)         |
| Never                             | 226 (55)           | 234 (52)         |
| Coronary artery disease, n (%)    | 35 (9)             | 36 (8)           |
| Diabetes mellitus, n (%)          | 48 (12)            | 53 (12)          |
| Hypertension, n (%)               | 155 (38)           | 190 (42)         |

*Definition of abbreviations:* ALS = amyotrophic lateral sclerosis; ALSFRS-R = ALS functional rating scale – revised.

Data are mean ± SD or median (25<sup>th</sup> percentile, 75<sup>th</sup> percentile).

**Table E3.** Results of survival regression analysis for non-invasive ventilation use among limb-onset ALS patients, stratified by time-matched groups (N=333)

| Variable                                   | Multivariate Analysis |               |         |
|--------------------------------------------|-----------------------|---------------|---------|
|                                            | HR                    | 95% CI        | P Value |
| Non-invasive ventilation                   | 0.63                  | 0.45 – 0.87   | 0.006   |
| Age at diagnosis, per decade               | 1.33                  | 1.14 – 1.54   | <0.001  |
| Body mass index class (kg/m <sup>2</sup> ) |                       |               |         |
| <18.5                                      | 1.43                  | 0.78 – 2.65   | 0.25    |
| 18.5 - 24.9                                | --                    | --            | --      |
| 25 - 29.9                                  | 0.88                  | 0.61 – 1.23   | 0.48    |
| ≥30                                        | 0.55                  | 0.33 – 0.91   | 0.02    |
| ALSFRS-R dyspnea                           |                       |               |         |
| >2                                         | --                    | --            | --      |
| ≤2                                         | 1.94                  | 1.37 – 2.75   | <0.001  |
| <b>Time-varying covariate</b>              |                       |               |         |
| Daily hours of non-invasive ventilation    | 1.00                  | 0.998 – 1.004 | 0.43    |

*Definition of abbreviations:* HR = hazard ratio; CI = confidence interval; ALSFRS-R = amyotrophic lateral sclerosis functional rating scale – revised.



**Figure E1.** Unadjusted, unstratified survival since matching for NIV subjects versus non-NIV subjects.

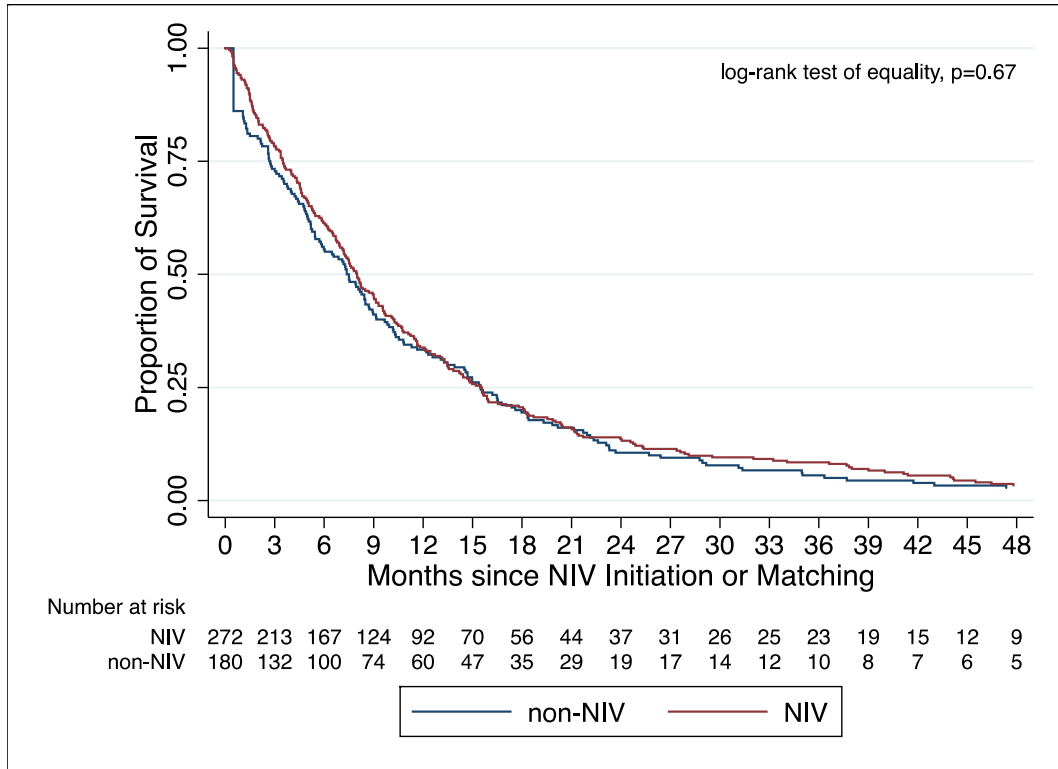

**Figure E2.** Patient reported daily NIV hourly usage in all NIV users (n=272), over months since matching.

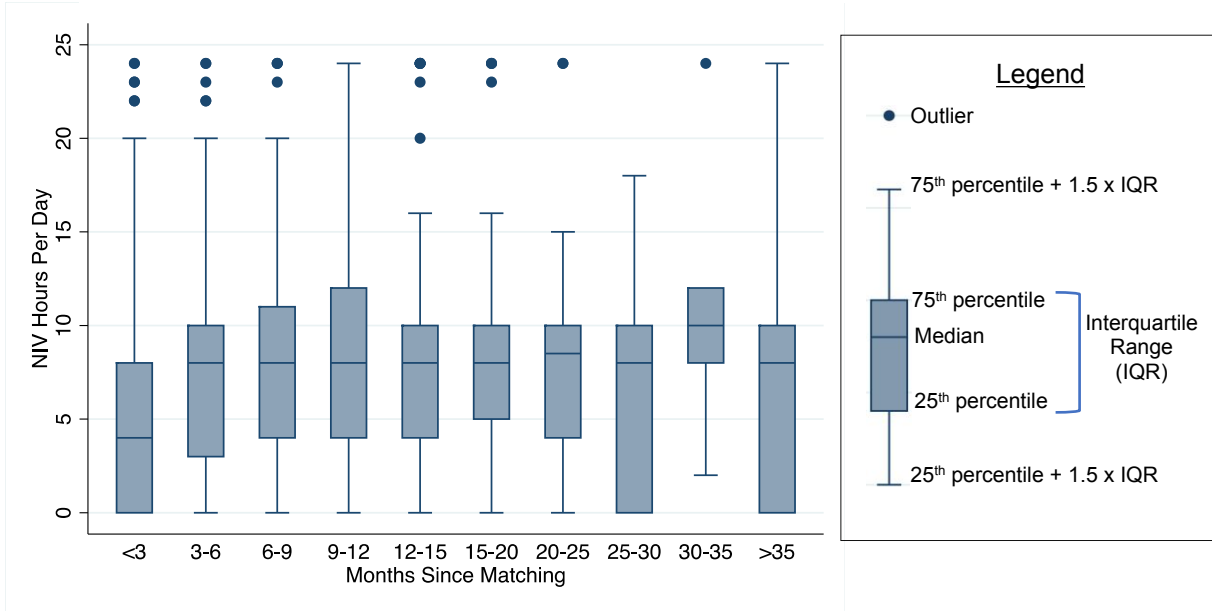

## References Cited

1. Pinto S, Carvalho M de. The R of ALSFRS-R: does it really mirror functional respiratory involvement in amyotrophic lateral sclerosis? *Amyotroph Lateral Scler Frontotemporal Degener* 2014;16:120–3.
2. Gordon PH, Miller RG, Moore DH. ALSFRS-R. *Amyotroph Lateral Sc* 2004;5:90–93.
3. Kimura F, Fujimura C, Ishida S, Nakajima H, Furutama D, Uehara H, Shinoda K, Sugino M, Hanafusa T. Progression rate of ALSFRS-R at time of diagnosis predicts survival time in ALS. *Neurology* 2006;66:265–267.
4. Rooney J, Burke T, Vajda A, Heverin M, Hardiman O. What does the ALSFRS-R really measure? A longitudinal and survival analysis of functional dimension subscores in amyotrophic lateral sclerosis. *J Neurology Neurosurg Psychiatry* 2016;88:381–385.
5. Bakker LA, Schröder CD, Es MA van, Westers P, Visser-Meily JMA, Berg LH van den. Assessment of the factorial validity and reliability of the ALSFRS-R: a revision of its measurement model. *Journal of Neurology* 2017;264:1413–1420.
6. Chiò A, Logroscino G, Hardiman O, Swingler R, Mitchell D, Beghi E, Traynor BG, Consortium O of the. Prognostic factors in ALS: A critical review. *Amyotrophic Lateral Sclerosis* 2009;10:310–323.
7. Creemers H, Grupstra H, Nollet F, Berg LH van den, Beelen A. Prognostic factors for the course of functional status of patients with ALS: a systematic review. *Journal of Neurology* 2015;262:1407–1423.

8. Enders CK. Multiple imputation as a flexible tool for missing data handling in clinical research. *Behav Res Ther* 2017;98:4–18.

9. Azur MJ, Stuart EA, Frangakis C, Leaf PJ. Multiple imputation by chained equations: what is it and how does it work? *International Journal of Methods in Psychiatric Research* 2011;20:40–49.
